# Supplementary material
Source: PubMed Central journal article supplement (PMC4981129)
Supplement: supp_tpc.16.00104_TPC2016-00104-BRR2_Supplemental_Data.pdf [file supp_tpc.16.00104_TPC2016-00104-BRR2_Supplemental_Data.pdf]

Supplemental Table 1. Primers used in this study.

| Primer name     | Sequence (5'-3')           |                                |
|-----------------|----------------------------|--------------------------------|
| PpDdl2/F10      | TTCTGTACTAGATCACCTGGAGG    | Probe 1 for Northern           |
| PpDdl2/R7       | AAGGAGCGTCCGAAGGATGTC      | Probe 1 for Northern           |
| PpDdl2/F11      | TTCCTTGATAAGTGGGACGAACG    | Probe 2 for Northern           |
| PpDdl2/R8       | AAGCGTCAGTATACTTCCTGTC     | Probe 2 for Northern           |
| PpDdl2/F7-SacI  | TTGGAGCTCTAGCTCACCTCTTT    | PpDdlp-TP-GFP                  |
| PpDdl2/R7-NcoI  | TTCCATGGTCGAGCTACGTTCC     | PpDdlp-TP-GFP, 35S-PpDdlTP-GFP |
| PpDdl2/F0-SalI  | TTGTGACATGGCGGTTTTGTTG     | 35S-PpDdlTP-GFP                |
| PpDdl2/F3       | TGGAATTCGCTGAATTCAGCG      | PpDdl KO                       |
| PpDdl2/R3       | CTCTTAATCTGTTGATGTCCACC    | PpDdl KO                       |
| PpDdl2/F4       | GTAGAAGACAAGACGGTCTG       | PpDdl KO, Southern             |
| PpDdl2/R4       | AAGTGCCAGGCGGAATCTGA       | PpDdl KO, Southern             |
| PpDdl2/F0       | ATGGCGCGTTTTGTTGCAATTCT    | RT-PCR for PpDdl gene          |
| PpDdl2/R0       | CTACTTTTGGAGTGCCAGATCG     | RT-PCR for PpDdl gene          |
| PpActin2F       | AAGATCTGGCACCACACGTTCT     | RT-PCR for PpActin gene        |
| PpActin2R       | TGCCGTGATCTCCTTGCTCATC     | RT-PCR for PpActin gene        |
| SALK_092419C_LP | ATTTTCCGTTTTCCCATGATC      | genomic PCR for tagged line    |
| SALK_092419C_RP | TATGACCAGGCTGAGAAATGG      | genomic PCR for tagged line    |
| LBb1.3          | ATTTTGCCGATTTCCGGAAC       | genomic PCR for SALK line      |
| SAIL_906_E06_LP | TTGGACTAGTAAACTTGGGCC      | genomic PCR for tagged line    |
| SAIL_906_E06_RP | TTAATGTTGGAGTGACCAGG       | genomic PCR for tagged line    |
| SAIL_LB1        | GCCTTTTCAGAAATGGATAAATAGCC | genomic PCR for SAIL line      |
| AtDdl F0        | ATGGCGTCCATGGCGACCGG       | RT-PCR for AtDdl gene          |
| AtDdl R0        | TCATGACGGACACCTGCCGC       | RT-PCR for AtDdl gene          |
| AtActin2-2 F    | CTGGATTCTGGTGTGGTGTGTCT    | RT-PCR for AtActin gene        |
| AtActin2-2 R    | GAACCACCGATCCAGACACTGTAC   | RT-PCR for AtActin gene        |
